# Supplementary material for: The anatomy and development of the nervous system in Magelonidae (Annelida) – insights into the evolution of the annelid brain
Source: PubMed Central journal article supplement (PMC6714456; doi:10.1186/s12862-019-1498-9), 2019-08-28

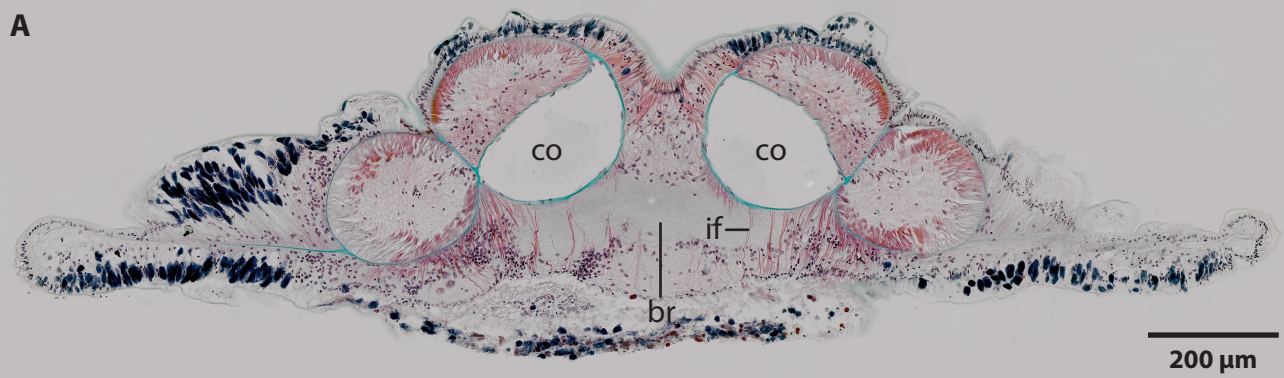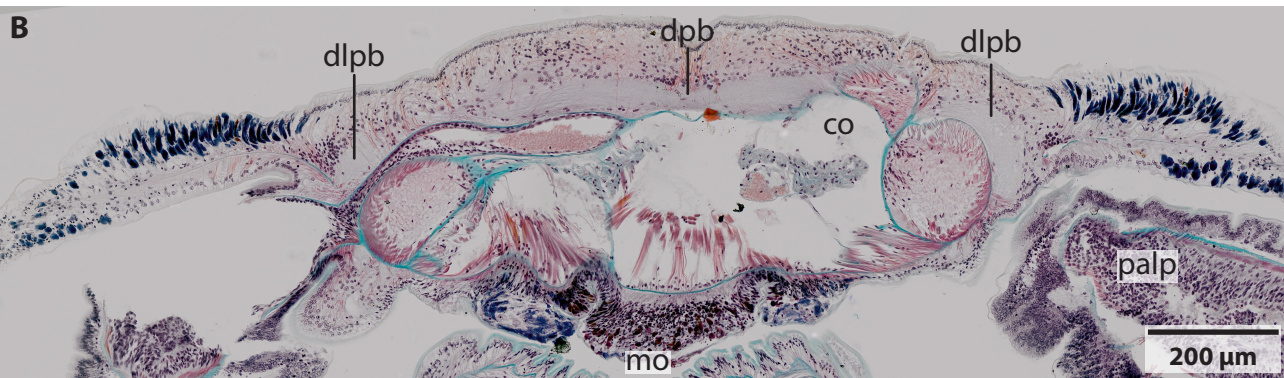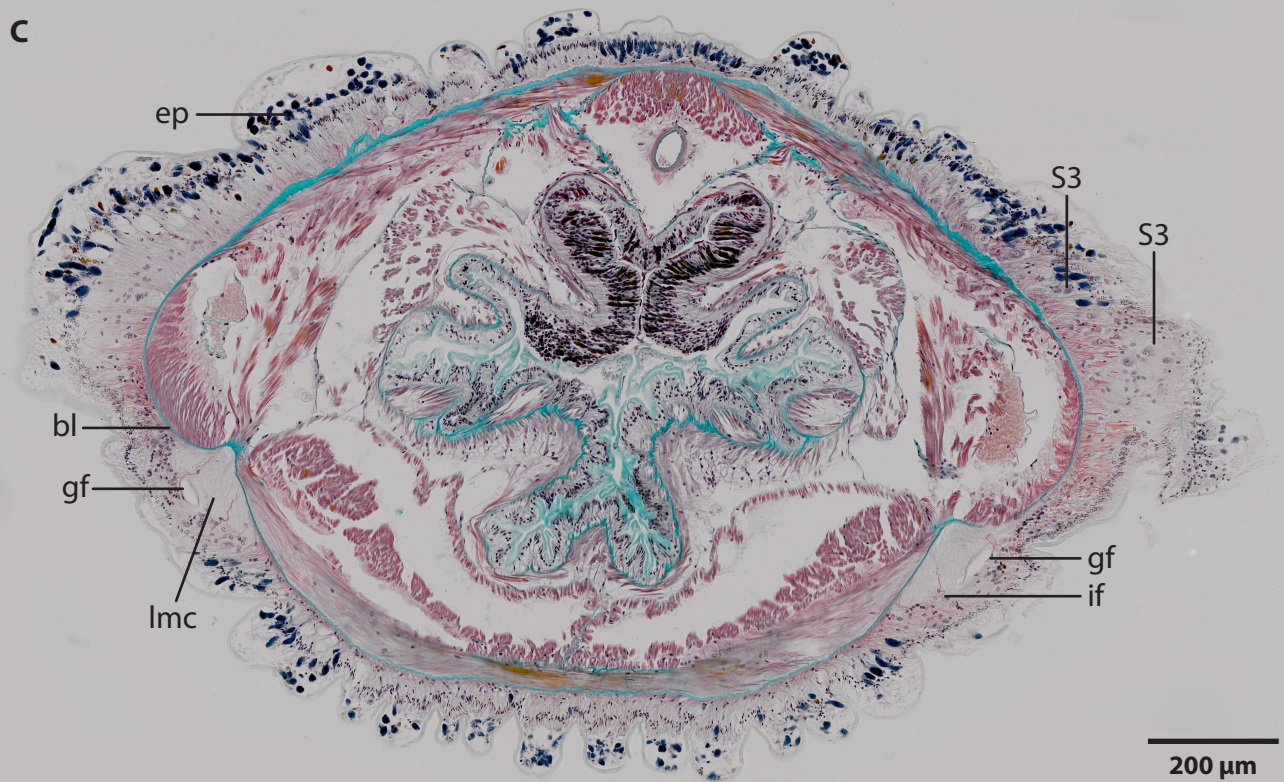

Supplement: 12862_2019_1498_MOESM1_ESM.pdf [file 12862_2019_1498_MOESM1_ESM.pdf]
